# Supplementary material for: Greater vegetable variety and amount are associated with lower prevalence of coronary heart disease: National Health and Nutrition Examination Survey, 1999–2014
Source: PubMed Central journal article supplement (PMC6040059; doi:10.1186/s12937-018-0376-4), 2018-07-10
Supplement: 12937_2018_376_MOESM1_ESM.pdf [file 12937_2018_376_MOESM1_ESM.pdf]

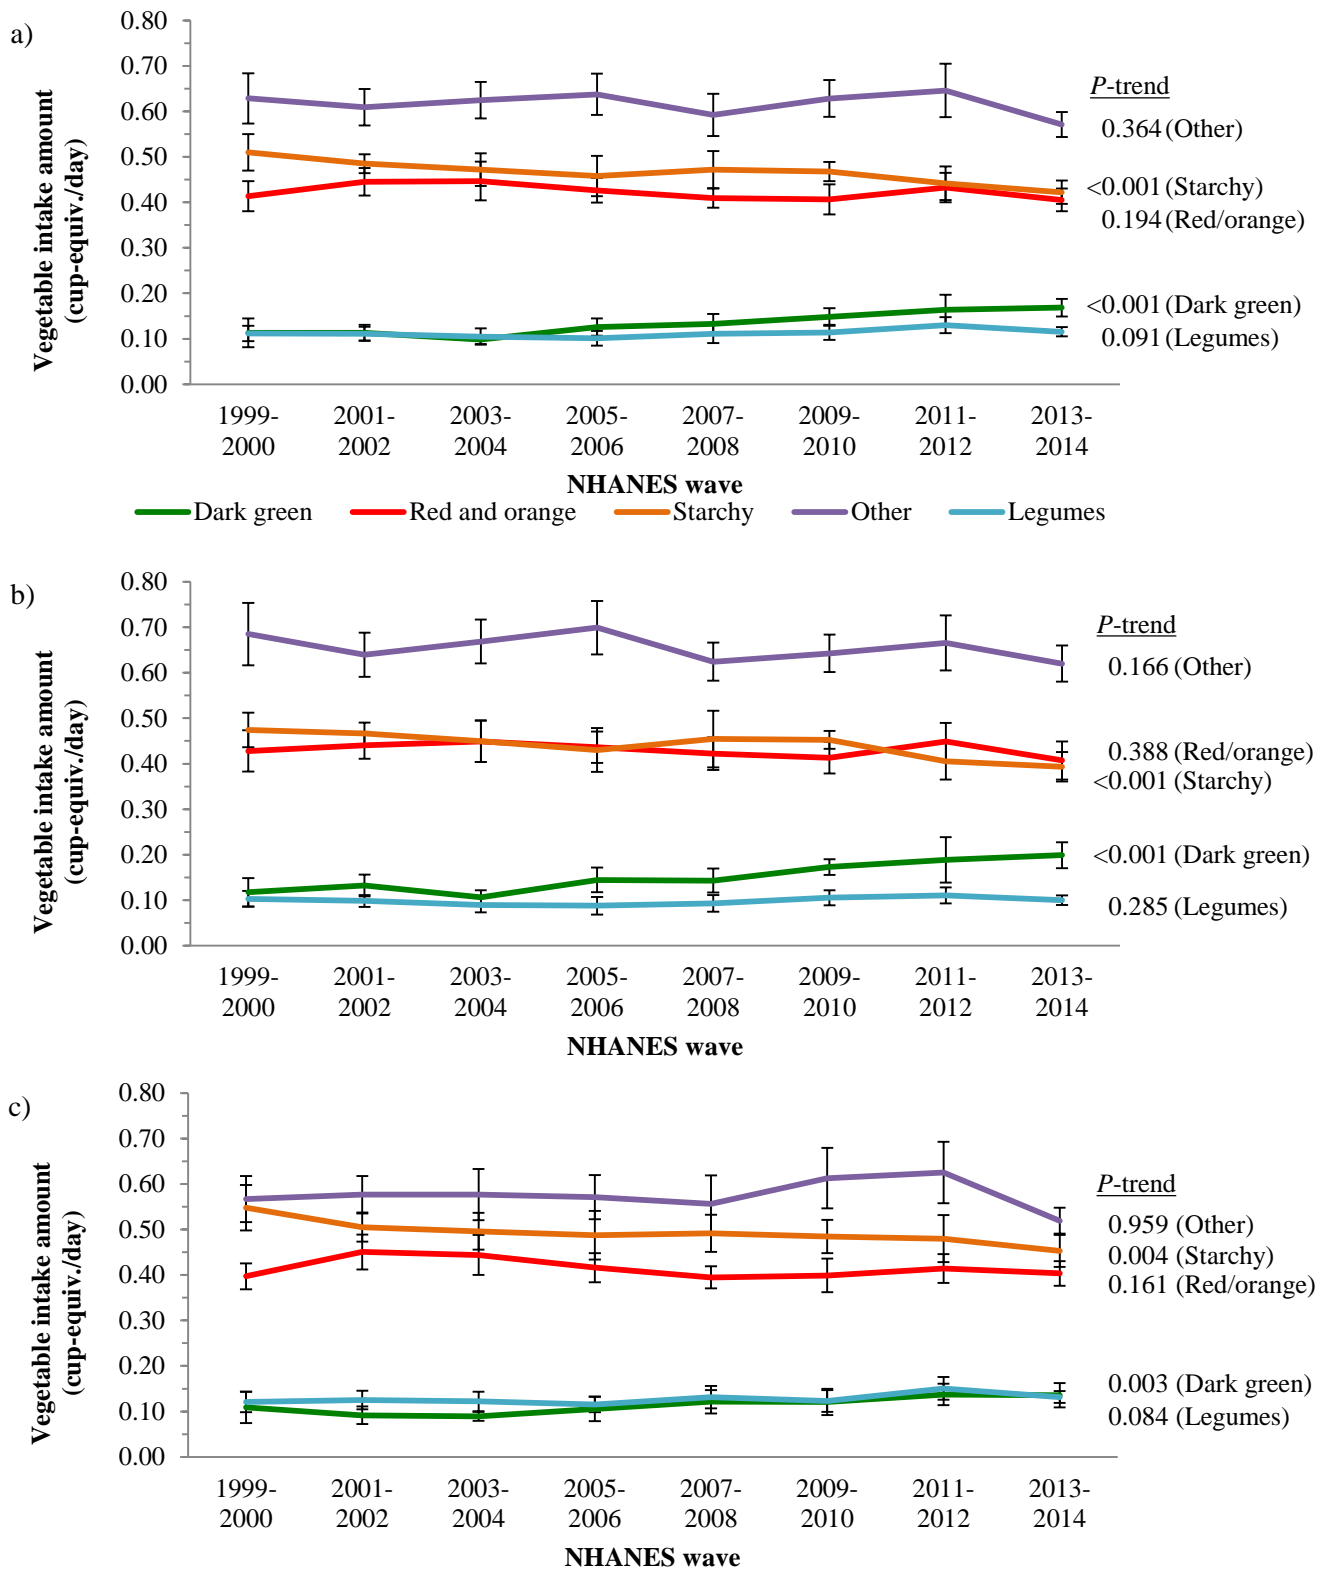

Figure S1: Trends in vegetable intake amount among adults a) overall, b) among females, and c) among males, from 1999-2014

NHANES, National Health and Nutrition Examination Survey  
 All data are energy-adjusted to 2,200 kcal/day.
