# Supplementary material for: Greater vegetable variety and amount are associated with lower prevalence of coronary heart disease: National Health and Nutrition Examination Survey, 1999–2014
Source: PubMed Central journal article supplement (PMC6040059; doi:10.1186/s12937-018-0376-4), 2018-07-10
Supplement: 12937_2018_376_MOESM2_ESM.pdf [file 12937_2018_376_MOESM2_ESM.pdf]

Table S1: Relationship between DGA vegetable intake variety and prevalence of cardiometabolic disease among men, 1999-2014

| Cardiometabolic disease outcome | Variety quintile 1 | Variety quintile 2 | Variety quintile 3  | Variety quintile 4 | Variety quintile 5 | <i>P</i> -trend |
|---------------------------------|--------------------|--------------------|---------------------|--------------------|--------------------|-----------------|
|                                 |                    |                    | Odds ratio (95% CI) |                    |                    |                 |
| Cardiometabolic                 | Referent           | 0.87 (0.68-1.11)   | 0.97 (0.76-1.25)    | 1.07 (0.85-1.36)   | 1.03 (0.81-1.31)   | 0.311           |
| Cardiovascular                  | Referent           | 0.87 (0.60-1.24)   | 0.92 (0.66-1.28)    | 0.81 (0.56-1.17)   | 0.81 (0.55-1.18)   | 0.237           |
| Coronary heart                  | Referent           | 0.75 (0.50-1.11)   | 0.79 (0.54-1.18)    | 0.63 (0.41-0.96)   | 0.66 (0.42-1.04)   | 0.046           |
| Stroke                          | Referent           | 1.16 (0.70-1.94)   | 1.17 (0.73-1.88)    | 1.27 (0.78-2.07)   | 1.23 (0.76-1.98)   | 0.328           |
| Diabetes                        | Referent           | 0.81 (0.82-1.30)   | 0.89 (0.68-1.17)    | 1.13 (0.87-1.46)   | 1.06 (0.80-1.42)   | 0.134           |

Adjusted for age, body mass index, smoking status, race/ethnicity, intake of fatty acids (unsaturated:saturated), intake of added sugar, income-to-poverty ratio, and education.

Maximum possible variety score is 64.

Median vegetable diversity scores for each quintile are: quintile 1=0, quintile2=0.17, quintile 3=0.33, quintile 4=0.43, quintile 5=0.52

Cardiometabolic disease includes coronary heart disease, stroke, and diabetes.

Cardiovascular disease includes coronary heart disease and stroke.
