# Supplementary material for: Greater vegetable variety and amount are associated with lower prevalence of coronary heart disease: National Health and Nutrition Examination Survey, 1999–2014
Source: PubMed Central journal article supplement (PMC6040059; doi:10.1186/s12937-018-0376-4), 2018-07-10
Supplement: 12937_2018_376_MOESM3_ESM.pdf [file 12937_2018_376_MOESM3_ESM.pdf]

Table S2: Relationship between DGA vegetable intake variety and prevalence of cardiometabolic disease among women, 1999-2014

| Cardiometabolic disease outcome | Variety quintile 1 | Variety quintile 2 | Variety quintile 3  | Variety quintile 4 | Variety quintile 5 | <i>P</i> -trend |
|---------------------------------|--------------------|--------------------|---------------------|--------------------|--------------------|-----------------|
|                                 |                    |                    | Odds ratio (95% CI) |                    |                    |                 |
| Cardiometabolic                 | Referent           | 0.83 (0.66-1.05)   | 0.98 (0.77-1.25)    | 0.89 (0.68-1.16)   | 0.97 (0.75-1.26)   | 0.974           |
| Cardiovascular                  | Referent           | 0.94 (0.68-1.29)   | 0.94 (0.68-1.30)    | 0.84 (0.60-1.17)   | 0.89 (0.65-1.23)   | 0.349           |
| Coronary heart                  | Referent           | 1.38 (0.88-2.16)   | 1.21 (0.77-1.90)    | 1.04 (0.65-1.66)   | 1.00 (0.61-1.63)   | 0.589           |
| Stroke                          | Referent           | 0.78 (0.54-1.11)   | 0.86 (0.58-1.29)    | 0.79 (0.52-1.19)   | 0.89 (0.61-1.29)   | 0.593           |
| Diabetes                        | Referent           | 0.82 (0.63-1.06)   | 0.96 (0.72-1.28)    | 0.87 (0.65-1.17)   | 1.02 (0.76-1.35)   | 0.766           |

Adjusted for age, body mass index, smoking status, race/ethnicity, intake of fatty acids (unsaturated:saturated), intake of added sugar, income-to-poverty ratio, and education.

Maximum possible variety score is 64.

Median vegetable diversity scores for each quintile are: quintile 1=0, quintile2=0.17, quintile 3=0.33, quintile 4=0.43, quintile 5=0.52

Cardiometabolic disease includes coronary heart disease, stroke, and diabetes.

Cardiovascular disease includes coronary heart disease and stroke.
