# Supplementary material for: Greater vegetable variety and amount are associated with lower prevalence of coronary heart disease: National Health and Nutrition Examination Survey, 1999–2014
Source: PubMed Central journal article supplement (PMC6040059; doi:10.1186/s12937-018-0376-4), 2018-07-10
Supplement: 12937_2018_376_MOESM4_ESM.pdf [file 12937_2018_376_MOESM4_ESM.pdf]

Table S3: Relationship between vegetable intake amount and prevalence of cardiometabolic disease among men, 1999-2014

| Cardiometabolic disease outcome | Amount quintile 1   | Amount quintile 2 | Amount quintile 3 | Amount quintile 4 | Amount quintile 5 | <i>P</i> -trend |
|---------------------------------|---------------------|-------------------|-------------------|-------------------|-------------------|-----------------|
|                                 | Odds ratio (95% CI) |                   |                   |                   |                   |                 |
| Cardiometabolic                 | Referent            | 0.91 (0.73-1.13)  | 1.00 (0.80-1.24)  | 1.00 (0.83-1.22)  | 1.04 (0.83-1.31)  | 0.489           |
| Cardiovascular                  | Referent            | 0.76 (0.58-1.00)  | 0.88 (0.67-1.16)  | 0.78 (0.60-1.00)  | 0.81 (0.61-1.07)  | 0.188           |
| Coronary heart                  | Referent            | 0.81 (0.59-1.10)  | 0.90 (0.66-1.25)  | 0.77 (0.57-1.04)  | 0.79 (0.58-1.08)  | 0.149           |
| Stroke                          | Referent            | 0.72 (0.49-1.06)  | 0.91 (0.62-1.34)  | 0.78 (0.54-1.14)  | 0.86 (0.58-1.27)  | 0.615           |
| Diabetes                        | Referent            | 1.01 (0.78-1.29)  | 1.03 (0.80-1.32)  | 1.08 (0.88-1.33)  | 1.12 (0.88-1.42)  | 0.314           |

Adjusted for age, body mass index, smoking status, race/ethnicity, intake of fatty acids (unsaturated:saturated), intake of added sugar, income-to-poverty ratio, and education.

Median energy-adjusted vegetable intake (cup-equivalents/day) for each quintile is: quintile 1=0, quintile 2=0.95, quintile 3=1.67, quintile 4=2.00, quintile 5=2.18

Cardiometabolic disease includes coronary heart disease, stroke, and diabetes.

Cardiovascular disease includes coronary heart disease and stroke.
