# Supplementary material for: Greater vegetable variety and amount are associated with lower prevalence of coronary heart disease: National Health and Nutrition Examination Survey, 1999–2014
Source: PubMed Central journal article supplement (PMC6040059; doi:10.1186/s12937-018-0376-4), 2018-07-10
Supplement: 12937_2018_376_MOESM5_ESM.pdf [file 12937_2018_376_MOESM5_ESM.pdf]

Table S4: Relationship between vegetable intake amount and prevalence of cardiometabolic disease among women, 1999-2014

| Cardiometabolic disease outcome | Amount quintile 1   | Amount quintile 2 | Amount quintile 3 | Amount quintile 4 | Amount quintile 5 | <i>P</i> -trend |
|---------------------------------|---------------------|-------------------|-------------------|-------------------|-------------------|-----------------|
|                                 | Odds ratio (95% CI) |                   |                   |                   |                   |                 |
| Cardiometabolic                 | Referent            | 0.86 (0.71-1.04)  | 1.09 (0.88-1.33)  | 0.88 (0.72-1.06)  | 0.89 (0.73-1.08)  | 0.360           |
| Cardiovascular                  | Referent            | 0.86 (0.67-1.11)  | 0.93 (0.72-1.21)  | 0.74 (0.56-0.98)  | 0.65 (0.49-0.88)* | 0.180           |
| Coronary heart                  | Referent            | 0.89 (0.62-1.28)  | 0.90 (0.62-1.31)  | 0.85 (0.58-1.25)  | 0.71 (0.51-1.00)  | 0.078           |
| Stroke                          | Referent            | 0.78 (0.52-1.17)  | 1.26 (0.87-1.83)  | 0.97 (0.71-1.33)  | 0.89 (0.63-1.24)  | 0.961           |
| Diabetes                        | Referent            | 0.93 (0.75-1.17)  | 1.06 (0.85-1.34)  | 0.88 (0.72-1.09)  | 0.91 (0.74-1.12)  | 0.362           |

Adjusted for age, body mass index, smoking status, race/ethnicity, intake of fatty acids (unsaturated:saturated), intake of added sugar, income-to-poverty ratio, and education.

Median energy-adjusted vegetable intake (cup-equivalents/day) for each quintile is: quintile 1=0, quintile2=0.95, quintile 3=1.56, quintile 4=1.78, quintile 5=2.01

Cardiometabolic disease includes coronary heart disease, stroke, and diabetes.

Cardiovascular disease includes coronary heart disease and stroke.

\**P*<0.05 (Bonferroni adjusted)
