# Supplementary material for: Greater vegetable variety and amount are associated with lower prevalence of coronary heart disease: National Health and Nutrition Examination Survey, 1999–2014
Source: PubMed Central journal article supplement (PMC6040059; doi:10.1186/s12937-018-0376-4), 2018-07-10
Supplement: 12937_2018_376_MOESM6_ESM.pdf [file 12937_2018_376_MOESM6_ESM.pdf]

Table S5: Relationship between vegetable intake amount and prevalence of cardiometabolic disease among men, 1999-2014

| Cardiometabolic disease outcome | Vegetable subtypes  |                  |                  |                   |                  |
|---------------------------------|---------------------|------------------|------------------|-------------------|------------------|
|                                 | Dark green          | Red/orange       | Legumes          | Starchy           | Other            |
|                                 | Odds ratio (95% CI) |                  |                  |                   |                  |
| Cardiometabolic                 |                     |                  |                  |                   |                  |
| Non-consumers                   | Referent            | Referent         | Referent         | Referent          | Referent         |
| Consumers                       | 0.95 (0.83-1.13)    | 0.97 (0.83-1.13) | 0.99 (0.83-1.18) | 1.11 (0.97-1.26)  | 0.96 (0.81-1.13) |
| Cardiovascular                  |                     |                  |                  |                   |                  |
| Non-consumers                   | Referent            | Referent         | Referent         | Referent          | Referent         |
| Consumers                       | 0.87 (0.7-1.07)     | 0.83 (0.68-1.01) | 1.08 (0.86-1.36) | 0.98 (0.81-1.19)  | 0.94 (0.75-1.18) |
| Coronary heart                  |                     |                  |                  |                   |                  |
| Non-consumers                   | Referent            | Referent         | Referent         | Referent          | Referent         |
| Consumers                       | 0.78 (0.60-1.01)    | 0.81 (0.64-1.02) | 1.19 (0.90-1.56) | 0.89 (0.71-1.10)  | 0.98 (0.74-1.30) |
| Stroke                          |                     |                  |                  |                   |                  |
| Non-consumers                   | Referent            | Referent         | Referent         | Referent          | Referent         |
| Consumers                       | 1.06 (0.76-1.49)    | 1.06 (0.76-1.49) | 0.88 (0.63-1.22) | 1.12 (0.88-1.42)  | 0.88 (0.62-1.24) |
| Diabetes                        |                     |                  |                  |                   |                  |
| Non-consumers                   | Referent            | Referent         | Referent         | Referent          | Referent         |
| Consumers                       | 0.98 (0.8-1.19)     | 1.03 (0.86-1.24) | 1.00 (0.83-1.20) | 1.20 (1.04-1.38)* | 0.95 (0.81-1.12) |

Adjusted for age, sex, body mass index, smoking status, race/ethnicity, intake of fatty acids (unsaturated:saturated), intake of added sugar, income-to-poverty ratio, education, and the consumption amount of the remaining vegetable subtypes.

Cardiometabolic disease includes coronary heart disease, stroke, and diabetes.

Cardiovascular disease includes coronary heart disease and stroke.

\* $P < 0.05$
