# Supplementary material for: Greater vegetable variety and amount are associated with lower prevalence of coronary heart disease: National Health and Nutrition Examination Survey, 1999–2014
Source: PubMed Central journal article supplement (PMC6040059; doi:10.1186/s12937-018-0376-4), 2018-07-10
Supplement: 12937_2018_376_MOESM7_ESM.pdf [file 12937_2018_376_MOESM7_ESM.pdf]

Table S6: Relationship between vegetable intake amount and prevalence of cardiometabolic disease among women, 1999-2014

| Cardiometabolic disease outcome | Vegetable subtypes  |                  |                  |                  |                  |
|---------------------------------|---------------------|------------------|------------------|------------------|------------------|
|                                 | Dark green          | Red/orange       | Legumes          | Starchy          | Other            |
|                                 | Odds ratio (95% CI) |                  |                  |                  |                  |
| Cardiometabolic                 |                     |                  |                  |                  |                  |
| Non-consumers                   | Referent            | Referent         | Referent         | Referent         | Referent         |
| Consumers                       | 0.90 (0.84-1.17)    | 0.99 (0.84-1.17) | 0.95 (0.80-1.13) | 1.03 (0.91-1.17) | 1.07 (0.92-1.24) |
| Cardiovascular                  |                     |                  |                  |                  |                  |
| Non-consumers                   | Referent            | Referent         | Referent         | Referent         | Referent         |
| Consumers                       | 0.86 (0.7-1.06)     | 0.98 (0.79-1.21) | 0.97 (0.79-1.18) | 1.05 (0.91-1.21) | 0.94 (0.75-1.18) |
| Coronary heart                  |                     |                  |                  |                  |                  |
| Non-consumers                   | Referent            | Referent         | Referent         | Referent         | Referent         |
| Consumers                       | 0.80 (0.58-1.12)    | 0.99 (0.73-1.34) | 1.21 (0.89-1.64) | 1.09 (0.88-1.35) | 0.92 (0.67-1.28) |
| Stroke                          |                     |                  |                  |                  |                  |
| Non-consumers                   | Referent            | Referent         | Referent         | Referent         | Referent         |
| Consumers                       | 0.91 (0.69-1.20)    | 0.91 (0.69-1.2)  | 0.79 (0.59-1.05) | 1.02 (0.83-1.27) | 1.01 (0.77-1.32) |
| Diabetes                        |                     |                  |                  |                  |                  |
| Non-consumers                   | Referent            | Referent         | Referent         | Referent         | Referent         |
| Consumers                       | 0.89 (0.75-1.06)    | 1.07 (0.89-1.29) | 0.93 (0.77-1.13) | 1.01 (0.88-1.16) | 1.11 (0.94-1.30) |

Adjusted for age, sex, body mass index, smoking status, race/ethnicity, intake of fatty acids (unsaturated:saturated), intake of added sugar, income-to-poverty ratio, education, and the consumption amount of the remaining vegetable subtypes.

Cardiometabolic disease includes coronary heart disease, stroke, and diabetes.

Cardiovascular disease includes coronary heart disease and stroke.

\* $P < 0.05$
